# Supplementary material for: Regulation of Oncogene Expression in T-DNA-Transformed Host Plant Cells
Source: PubMed Central journal article supplement (PMC4304707; doi:10.1371/journal.ppat.1004620), 2015-01-23
Supplement: ppat.1004620.s001.pdf [file ppat.1004620.s001.pdf]

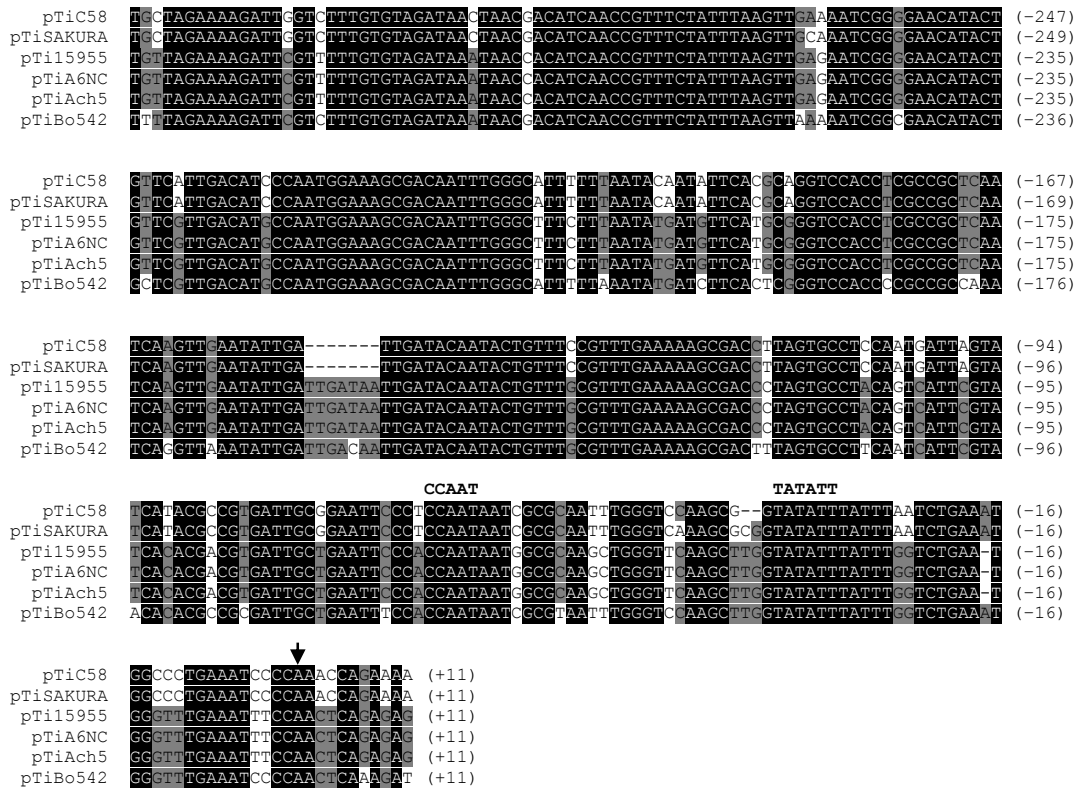

**Figure S1 Alignment of *IaaH* promoters including the 5' untranslated regions from different *A. tumefaciens* strains.**

Nucleotide sequences of indole-3-acetamide hydrolase (*IaaH*) promoters including the 5' untranslated regions of T-DNAs from the nopaline-type (pTiC58, pTiSAKURA), octopine-type (pTi15955, pTiA6NC, pTiAch5) and agropine-type (pTiBo542) Ti plasmids. The arrow indicates the position of the transcription start sites (TSS) +1. Negative numbers indicate the nucleotide positions upstream and positive numbers downstream of the TSSs. TATA box and CAAT box sequences are written above the aligned sequences.
