# Supplementary material for: Regulation of Oncogene Expression in T-DNA-Transformed Host Plant Cells
Source: PubMed Central journal article supplement (PMC4304707; doi:10.1371/journal.ppat.1004620), 2015-01-23
Supplement: ppat.1004620.s004.pdf [file ppat.1004620.s004.pdf]

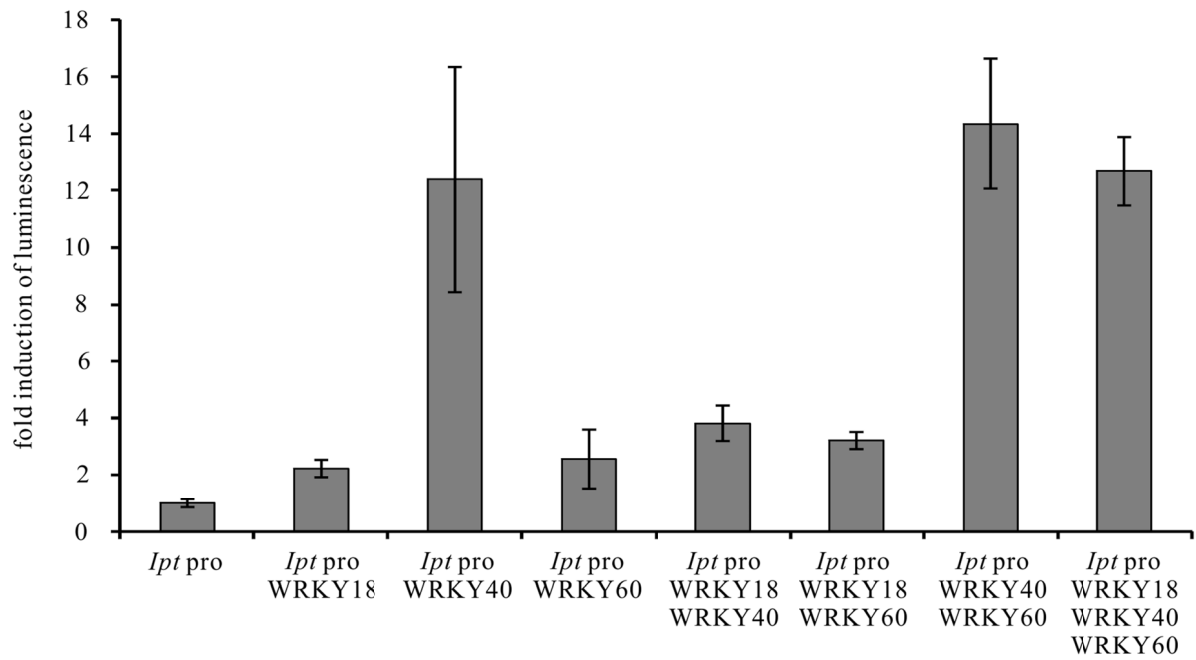

**Figure S4 The effects of WRKY18, WRKY40 and WRKY60 on *Ipt* promoter activity.**

Fold induction of *Ipt* promoter-driven luminescence in the presence of WRKY18, WRKY40 and WRKY60 transcription factor expression plasmids in the protoplast transactivation system. The relative luminescence induced by the *Ipt* promoter in protoplasts without transfection of any of the transcription factor expression plasmids was set to 1. Bars show mean values ( $\pm$ SD) of three independent experiments.
