# Supplementary material for: Regulation of Oncogene Expression in T-DNA-Transformed Host Plant Cells
Source: PubMed Central journal article supplement (PMC4304707; doi:10.1371/journal.ppat.1004620), 2015-01-23
Supplement: ppat.1004620.s005.pdf [file ppat.1004620.s005.pdf]

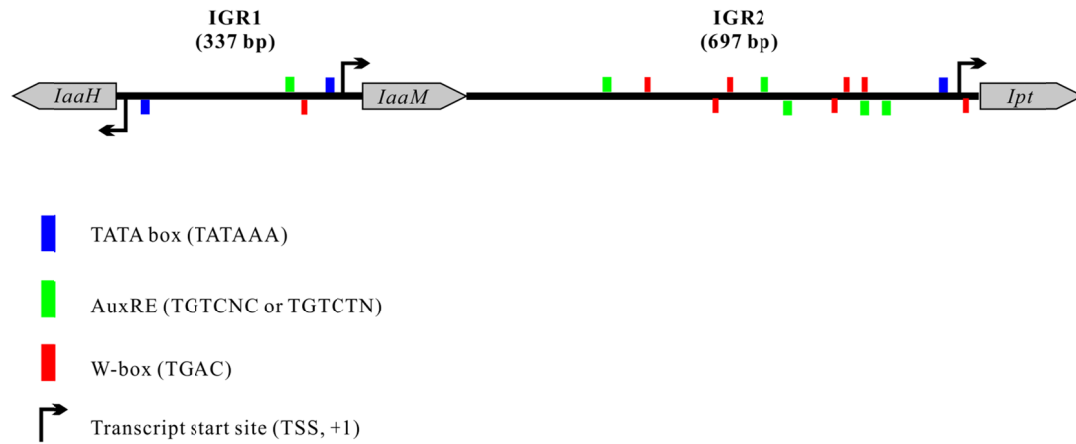

**Figure S5 *Cis*-regulatory elements within IGR1 and IGR2.**

Positions of TATA boxes (TATAAA, blue bars), auxin responsive elements (AuxREs, TGTCNC or TGTCTN, green bars), W-boxes (TGAC, red bars) and transcript start site (TSS arrow) in the sense (above the line) and anti-sense strand (below the line) of the intergenic region (IGR1) and IGR2.
