# Supplementary material for: Regulation of Oncogene Expression in T-DNA-Transformed Host Plant Cells
Source: PubMed Central journal article supplement (PMC4304707; doi:10.1371/journal.ppat.1004620), 2015-01-23
Supplement: ppat.1004620.s006.pdf [file ppat.1004620.s006.pdf]

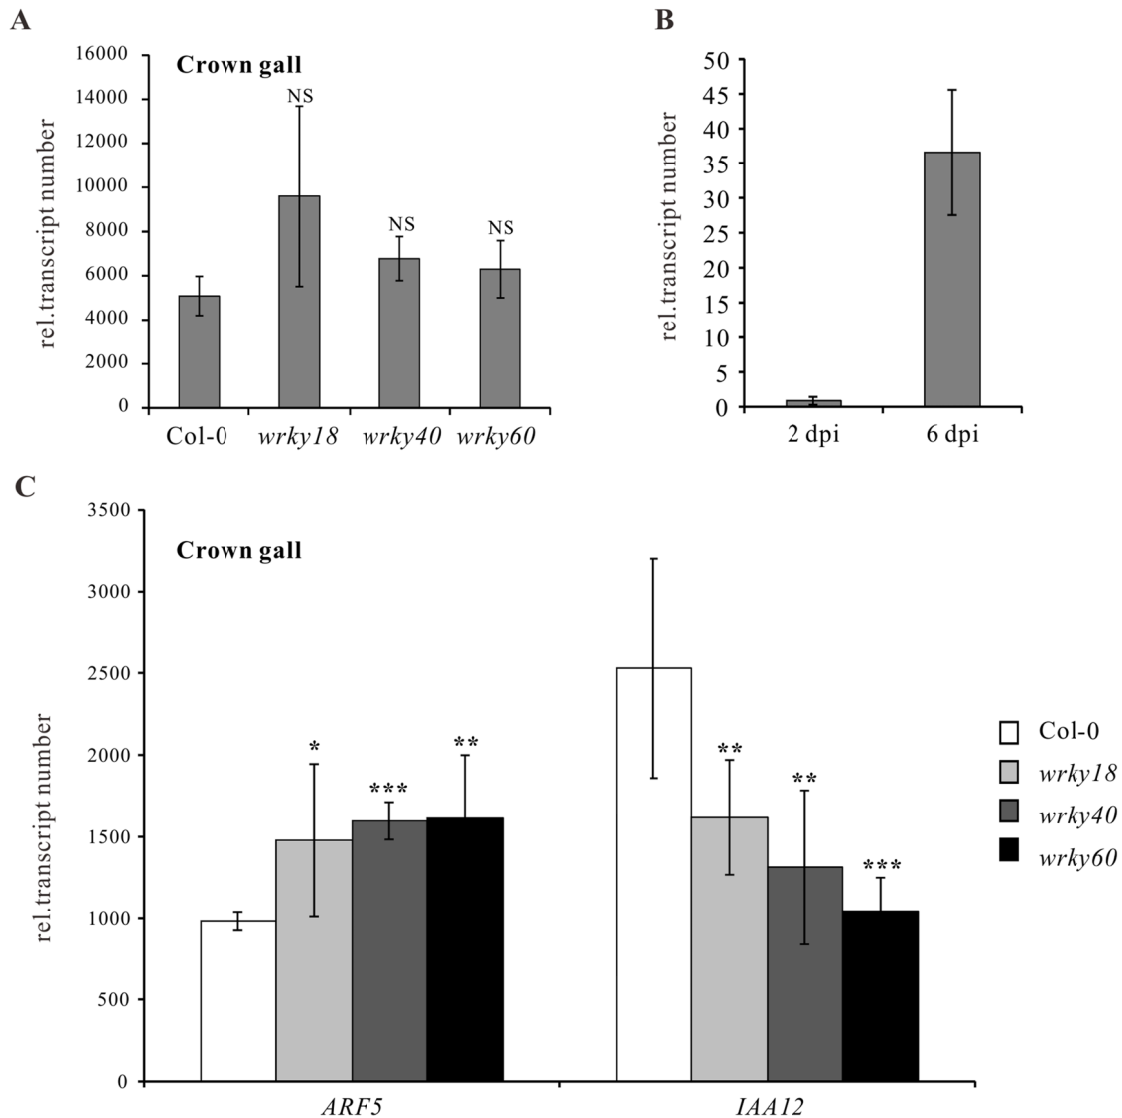

**Figure S6 *Ipt*, *ARF5* and *IAA12* gene expression.**

(A) Relative transcript numbers of the *Ipt* oncogene in 25-day-old crown galls of wild-type plants and *wrky18*, *wrky40* and *wrky60* single mutants, (B) in stems of wild-type plants 2 days and 6 days post-inoculation (2 dpi and 6 dpi) of *A. tumefaciens* strain C58 and (C) of *ARF5* and *IAA12* in crown gall tumors of the wild-type Col-0 and *wrky* single mutants. Relative transcript numbers were quantified by qRT-PCR and normalized to 10,000 molecules of *ACTIN2/8*. Bars show mean values ( $\pm$ SD) of three independent samples. NS: not significant. \* *p*-value < 0.05; \*\* *p*-value < 0.01; \*\*\* *p*-value < 0.001; NS: not significant (Student's t-test).
